# Supplementary material for: The electrochemical storage mechanism of an In2S3/C nanofiber anode for high-performance Li-ion and Na-ion batteries
Source: Royal Society of Chemistry journal article supplement (doi:10.1039/d0nr04843g), 2020-01-01
Supplement: d0nr04843g1.pdf [file d0nr04843g1.pdf]

## Supporting information for

# **Electrochemical storage mechanism of In<sub>2</sub>S<sub>3</sub>/C nanofiber anode for high-performance Li-ion and Na-ion Batteries**

Yiting Yuan <sup>a</sup>, Min Yang <sup>a,&</sup>, Li Liu <sup>a,b\*</sup>, Jing Xia <sup>a</sup>, Hanxiao Yan <sup>a</sup>, Junfang Liu <sup>a</sup>, Jiabin Wen <sup>a</sup>,  
Yue Zhang <sup>a</sup>, Xianyou Wang <sup>a</sup>

(*a* National Base for International Science & Technology Cooperation, National Local Joint Engineering Laboratory for Key materials of New Energy Storage Battery, Hunan Province Key Laboratory of Electrochemical Energy Storage and Conversion, School of Chemistry, Xiangtan University, Xiangtan 411105, China

*b* Key Laboratory of Advanced Energy Materials Chemistry (Ministry of Education), Nankai University, Tianjin 300071, China)

## **Experimental section**

**Preparation of materials :** The In<sub>2</sub>S<sub>3</sub>/C nanofibers were fabricated by a simple electrospinning method. Firstly, 0.3 g polyacrylonitrile (PAN, average Mw=150000, Macklin, China) and 0.2 g polyvinylpyrrolidone (PVP, average Mw=1300000, Alfa Aesar, US) were dissolved in 5 mL N,N-dimethylformamide (DMF, anhydrous, 99.9%, Sinopharm Chemical Reagent Co. Ltd, China) solvent with vigorous stirring at 60°C for 4 h. Then 3 mmol indium(III) chloride (InCl<sub>3</sub>, anhydrous, 99.9%, Macklin, China) was dissolved in the PAN-PVP-DMF mixed solution with vigorous stirring at 60°C for 4 h. The obtained mixture was used as the work solution for electrospinning.

---

<sup>&</sup> *Co-first author: contributed equally to this work.*

<sup>\*</sup> *Corresponding author at : School of Chemistry, Xiangtan University, Xiangtan 411105, China.  
E-mail addresses: [liulili1203@126.com](mailto:liulili1203@126.com) (L. Liu)*

The work solution was loaded into a 5 mL plastic syringe equipped with a 22-gauge flat-needle. The flow rate of the solution was controlled by a single channel syringe pump to be 0.3 mL h<sup>-1</sup>. The flat-needle was connected to a high voltage power supply that applies a voltage of 16 kV. A grounded aluminum foil was placed 15 cm below the flat-needle to collect the nanofibers.

The as-collected precursor fibers were preliminary oxidized firstly, the tube furnace was heated to 200°C and held for 2 h in the air. The heating rate in all heating processes is 2°C min<sup>-1</sup>. Then, the oxidized precursor fibers were sulfuretted in a tube furnace where high-purity nitrogen (N<sub>2</sub>) circulated. The sulfidation method is similar to our previous work.<sup>1</sup> Specifically, the precursor fibers and thiourea (CN<sub>2</sub>H<sub>4</sub>S, 99%, Aladdin, China) in a mass ratio of 1:3 were placed in two different porcelain boats. The porcelain boat containing thiourea was placed upstream of the N<sub>2</sub> atmosphere, and the porcelain boat containing the precursor fibers was placed downstream of the N<sub>2</sub> atmosphere. The tube furnace was heated to 250°C and held for 2 h. In this process, thermoplastic PAN and PVP were converted to non-plastic compound.<sup>2</sup> Besides, thiourea was decomposed and produces the gas phase product dominated by CS<sub>2</sub> and NH<sub>3</sub>. Therefore, InCl<sub>3</sub> was sulfuretted by CS<sub>2</sub> into In<sub>2</sub>S<sub>3</sub>. After the vulcanization was completed, the glass tube naturally cooled down to room temperature then removes the porcelain boat containing thiourea residue. Finally, the fibers were carbonized in tube furnace at N<sub>2</sub> atmosphere. The temperature was raised to 700°C for 4 h. After the glass tube naturally cooled down to room temperature, In<sub>2</sub>S<sub>3</sub>/C nanofibers were obtained.

**Materials characterization:** The crystal structure of samples was studied by X-ray diffraction (XRD, Bruker D8 ADVANCE, Cu K $\alpha$  radiation,  $\lambda = 1.54439 \text{ \AA}$ ) at a scanning rate of  $2^\circ \text{ min}^{-1}$ . Raman spectrum was measured on a confocal Raman microscope (Renishaw 2000) with a 532 nm wavelength argon-ion laser. X-ray photoelectron spectroscopy (XPS, K-Alpha<sup>+</sup>, Thermo fisher Scientific) equipped with a monochromatic Al-K $\alpha$  X-ray source ( $h\nu = 1486.6\text{eV}$ ) was used to investigate the surface elemental states. The morphology and microstructure were observed using field-emission scanning electron microscopy (FE-SEM, SIGMA HD-01-61, Carl Zeiss) and transmission electron microscopy (TEM, FEI-Tecnai G2 TF20). Brunauer-Emmett-Teller (BET) method was implemented to investigate the specific surface area and pore size distribution of the samples by N<sub>2</sub> adsorption-desorption isotherms on a Micromeritics ASAP 2020 HD88 apparatus. The content of In<sub>2</sub>S<sub>3</sub> and carbon in the In<sub>2</sub>S<sub>3</sub>/C nanofibers was detected by a thermogravimetry analyzer (TG, Labsys Evo, Setaram) from room temperature to 800°C with a heat rate of  $10^\circ \text{C min}^{-1}$  in air. The content of In<sub>2</sub>S<sub>3</sub> in In<sub>2</sub>S<sub>3</sub>/C nanofibers was calculated based on the following formula:

$$\text{In}_2\text{S}_3 \text{ (wt. \%)} = 100 \times \frac{\text{molecular weight of In}_2\text{S}_3}{\text{molecular weight of In}_2\text{O}_3} \times \frac{\text{final weight}}{\text{initial weight}}$$

**Electrochemical tests:** The lithium/sodium storage performance of In<sub>2</sub>S<sub>3</sub>/C nanofiber anode was tested in the CR2025 coin-type cells, which were assembled in a glovebox (H<sub>2</sub>O and O<sub>2</sub> value < 0.1 ppm). The slurries of working electrodes were fabricated by using the In<sub>2</sub>S<sub>3</sub>/C nanofibers (active material), carbon black (conductive agent) and polyvinylidene fluoride (PVDF, binder) with a weight ratio of 70:20:10

mingled in N-methyl pyrrolidinone (NMP, solvent), and continuously stirred for 8 h. The as-prepared slurries were uniformly coated on the Cu foil current collector, and dried under vacuum at 80 °C for 12 hours. After the drying was completed, the Cu foil was cut into disks with a diameter of 1 cm as the working electrodes. Metallic Li and metallic Na were employed as the counter/reference electrode for LIBs and SIBs, respectively. 1 M LiPF<sub>6</sub> added in a commixture solution of ethylene carbonate (EC) and dimethyl carbonate (DMC) (1:1, vol. %) was applied as the lithium-ion battery electrolyte. The sodium-ion battery electrolyte was composed of 1 M NaClO<sub>4</sub> added in a commixture solution of propylene carbonate (PC) and ethylene carbonate (EC) (1:1, vol. %) and 5 % fluorinated ethylene carbonate (FEC) additive. The lithium-ion battery separator and the sodium-ion battery separator were employed the Whatman GF/A and GF/D glass microfiber film, respectively. The cycling performance and rate capability were tested by using the CT-3008 battery tester (Neware BTS, China). The voltage test ranges in LIBs and SIBs are set at 0.01-3.0 V and 0.01-2.5 V, respectively. The discharge and charge specific capacities in this work were calculated based on the full weight of In<sub>2</sub>S<sub>3</sub>/C nanofiber composite. Cyclic voltammetry (CV) measurements and electrochemical impedance spectroscopy (EIS) were performed on the CHI660e electrochemical workstation. The scan rate of CV measurement was set to 0.1 mV s<sup>-1</sup>. The EIS tests were implemented a sine wave with an AC amplitude of 5 mV in 0.01 Hz to 100kHz. The obtained EIS results were simulated by an equivalent circuit model (the inset in [Fig. S8](#)). In the equivalent circuit model, the R<sub>s</sub> represent the ionic resistance of the electrolyte, the CPE is linked

with the interfacial resistance, the  $W_o$  is concerned with the diffusion of ions into the bulk of the electrode material, the  $R_{sei}$  is related to the resistance caused by SEI film, the  $R_{ct}$  is relevant to the charge transfer resistance.

### Supplementary figures

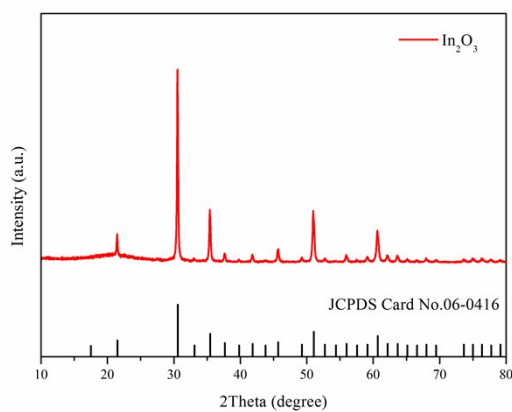

Fig. S1 XRD pattern of the combustion products after TG test.

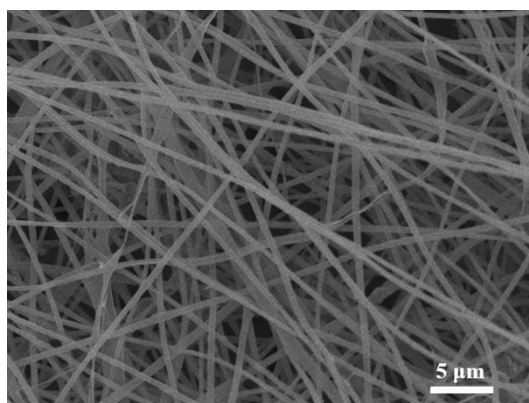

Fig. S2 SEM image of the precursor nanofibers.

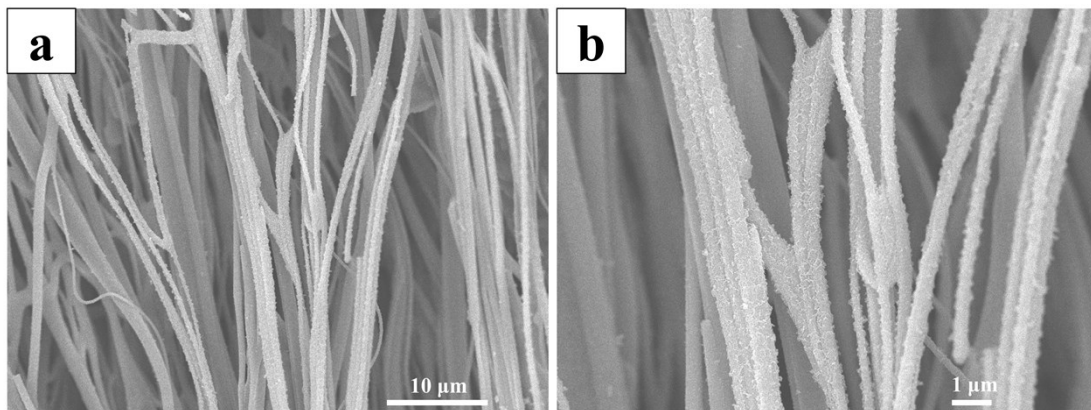

Fig. S3 (a, b) FE-SEM images of the  $\text{In}_2\text{S}_3$  nanofibers.

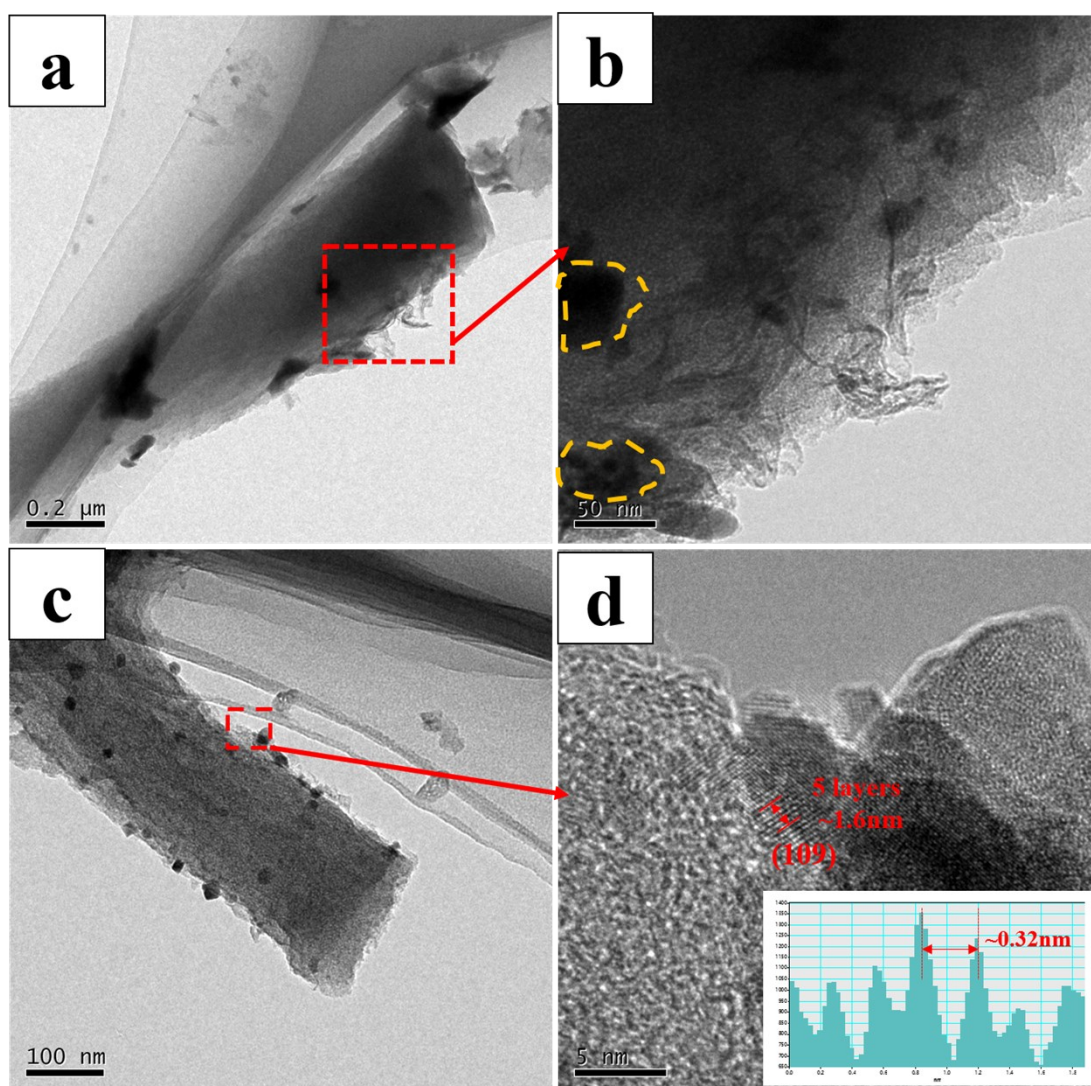

Fig. S4 (a, b, c) TEM images of  $\text{In}_2\text{S}_3/\text{C}$  nanofibers; (d) HR-TEM image and the interplanar crystal spacing statistical tables (inset) of  $\text{In}_2\text{S}_3/\text{C}$  nanofibers.

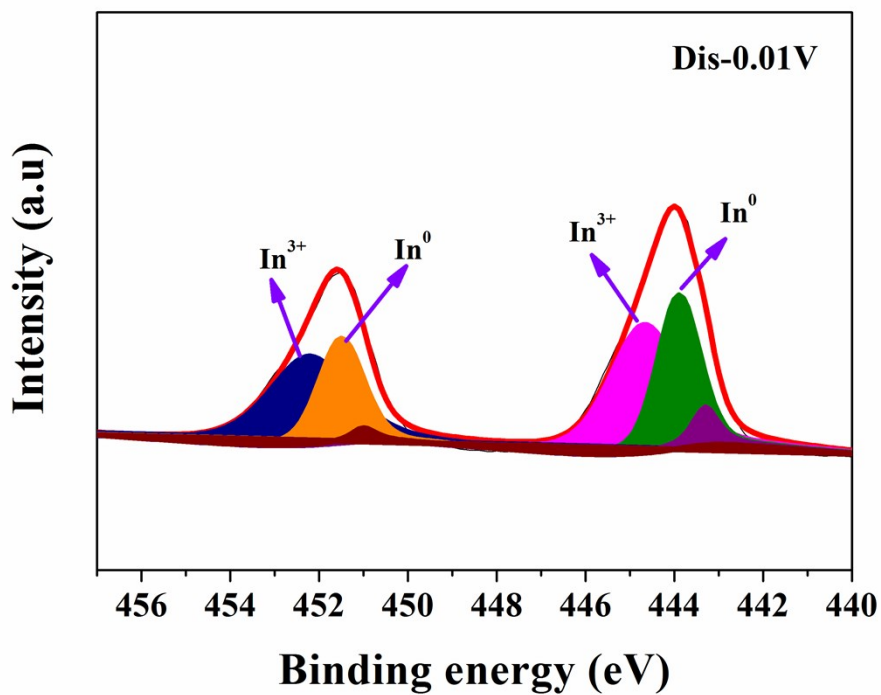

Fig. S5 the high resolution In3d spectrum at dis-0.01V.

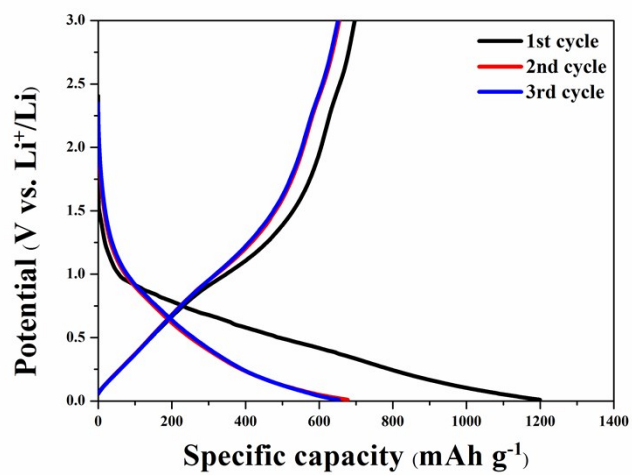

Fig. S6 Galvanostatic charge/discharge voltage profiles of  $\text{In}_2\text{S}_3/\text{C}$  nanofiber anode at

$50 \text{ mA g}^{-1}$  in LIBs.



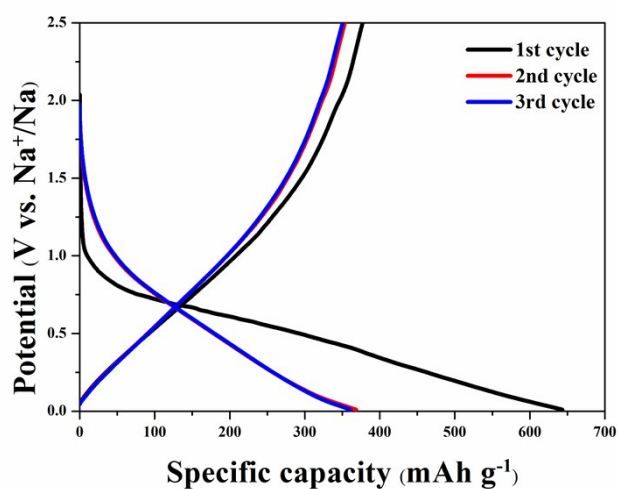

Fig. S7 Galvanostatic charge/discharge voltage profiles of  $\text{In}_2\text{S}_3/\text{C}$  nanofiber anode at  $50 \text{ mA g}^{-1}$  in SIBs.

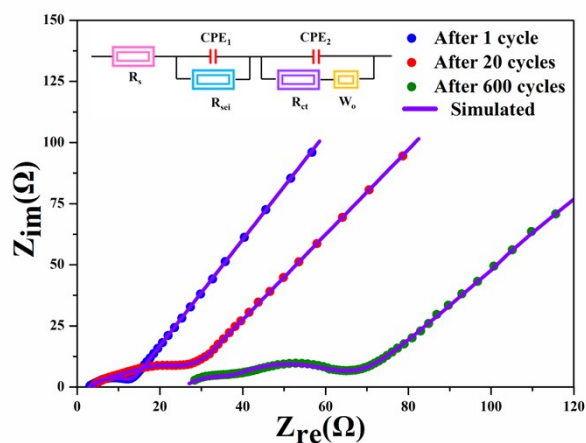

Fig. S8 Electrochemical impedance spectra (EIS) and equivalent electric circuit (inset) of the  $\text{In}_2\text{S}_3/\text{C}$  nanofiber anode in LIBs after 1 and 20 cycles at  $50 \text{ mA g}^{-1}$  and after 600 cycles at  $1000 \text{ mA g}^{-1}$ .

Table S1 Simulated impedance parameters ( $R_s$ ,  $R_{\text{sei}}$  and  $R_{\text{ct}}$ ) of  $\text{In}_2\text{S}_3/\text{C}$  nanofiber electrode in LIBs.

| Cycle number | $R_s(\Omega)$ | $R_{\text{sei}}(\Omega)$ | $R_{\text{ct}}(\Omega)$ |
|--------------|---------------|--------------------------|-------------------------|
|--------------|---------------|--------------------------|-------------------------|



|     |      |      |      |
|-----|------|------|------|
| 1   | 2.9  | 1.2  | 7.1  |
| 20  | 4.2  | 4.6  | 12.6 |
| 600 | 25.9 | 12.9 | 20.3 |

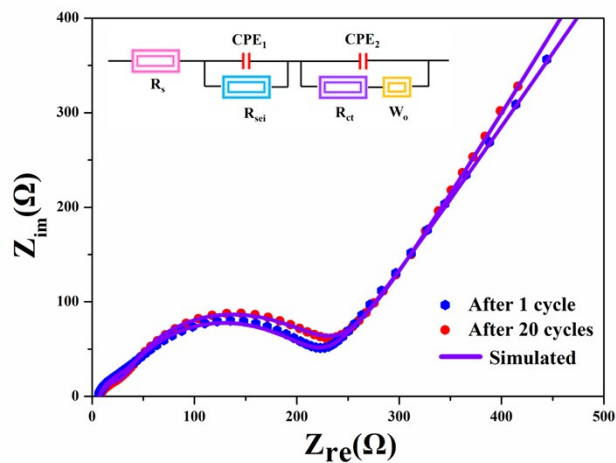

Fig. S9 Electrochemical impedance spectra (EIS) and equivalent electric circuit (inset) of the  $\text{In}_2\text{S}_3/\text{C}$  nanofiber anode in SIBs after 1 and 20 cycles at  $50 \text{ mA g}^{-1}$ .

Table S2 Simulated impedance parameters ( $R_s$ ,  $R_{\text{sei}}$  and  $R_{\text{ct}}$ ) of  $\text{In}_2\text{S}_3/\text{C}$  nanofiber electrode in SIBs.

| Cycle number | $R_s(\Omega)$ | $R_{\text{sei}}(\Omega)$ | $R_{\text{ct}}(\Omega)$ |
|--------------|---------------|--------------------------|-------------------------|
| 1            | 7.2           | 27.9                     | 150.6                   |
| 20           | 7.4           | 28.0                     | 162.6                   |

### **Supplementary references**

1. J. Xia, L. Liu, S. Jamil, J. Xie, H. Yan, Y. Yuan, Y. Zhang, S. Nie, J. Pan, X. Wang and G. Cao, *Energy Storage Mater.*, 2019, **17**, 1-11.
2. Y. Liu, N. Zhang, L. Jiao and J. Chen, *Adv. Mater.*, 2015, **27**, 6702-6707.
